# Supplementary material
Source: PubMed Central journal article supplement (PMC5794727)
Supplement: ajcr0008-0132-f6.pdf [file ajcr0008-0132-f6.pdf]

## ARRDC1 and ARRDC3 facilitate YAP1 degradation

**Supplementary Table 1.** Sequences for shRNAs, siRNAs and primers used for qRT-PCR

| Sequences for siRNAs  |                             |                            |
|-----------------------|-----------------------------|----------------------------|
| Gene                  | Sequence                    |                            |
| sh-ARRDC1#1           | 5'-CTCGTGTCTATATCTTGA-3'    |                            |
| sh-ARRDC1#2           | 5'-CCAAGAAGTTCTCCTACAA-3'   |                            |
| sh-ARRDC3#1           | 5'-GGCCTTGGCTACTACCAGT-3'   |                            |
| sh-ARRDC3#2           | 5'-GCGTGGAAATTTACTAAT-3'    |                            |
| sh-YAP1               | 5'-CUGCCACCAAG UAGAUAAAT-3' |                            |
| sh-control            | 5'-TTCTCCGAACGTGTCACGT-3'   |                            |
| Sequences for primers |                             |                            |
| Gene                  | RT Forward                  | RT Reverse                 |
| ARRDC1                | 5'-CAGTGCCCACTACCAGCAC-3'   | 5'-ATAGGGGTAGCCCAAGAAC-3'  |
| ARRDC3                | 5'-CATCTTAATTGGGCACGAAA-3'  | 5'-GTGGAAGCTCGAAGCTGAAT-3' |
| CYR61                 | 5'-CTGCCTTAGTCGTCACCC-3'    | 5'-CGCCGAAGTTGCATTCCAG-3'  |
| CTGF                  | 5'-ACTATGATTAGACCAACTG-3'   | 5'-TGTCTCTTCCAGGTCAG-3'    |

**Supplementary Table 2.** Antibody list

| Antibody epitope | Mono/polyclonal | Host   | Source         | Catalog No. | Application |
|------------------|-----------------|--------|----------------|-------------|-------------|
| ARRDC1           | Monoclonal      | Mouse  | Santa Cruz     | sc-398652   | WB, IP      |
| ARRDC3           | Polyclonal      | Rabbit | Santa Cruz     | sc-135442   | WB, IP, IHC |
| YAP1             | Monoclonal      | Rabbit | Cell Signaling | #14074      | WB, IP, IHC |
| Actin            | Monoclonal      | Mouse  | Sigma          | A2228       | WB          |
| E-Cadherin       | Polyclonal      | Rabbit | Proteintech    | 20874       | WB          |
| N-Cadherin       | Polyclonal      | Rabbit | Proteintech    | 22018       | WB          |
| Vimentin         | Polyclonal      | Rabbit | Proteintech    | 10366       | WB          |
| Myc              | Polyclonal      | Rabbit | MBL            | 562         | WB, IF      |
| HA               | Monoclonal      | Mouse  | MBL            | M180-3      | WB          |
| FLAG             | Monoclonal      | Mouse  | Sigma          | F1804       | WB, IF, IP  |

IF: immunofluorescence; IP: immunoprecipitation; IHC: immunohistochemistry; WB: Western blotting.

**Supplementary Table 3.** Patient characteristics and clinicopathological factors by ARRDC3 and YAP1 expression

|                    | ARRDC3 neg | ARRDC3 pos | <i>p</i> value | YAP1 neg | YAP1 pos | <i>P</i> value |
|--------------------|------------|------------|----------------|----------|----------|----------------|
| NO. of patients    | 14         | 26         |                | 4        | 36       |                |
| Median age (years) | 57.3       | 52.9       |                | 53       | 56.1     |                |
| Sex                |            |            | 0.7410         |          |          | 0.6235         |
| Male               | 8          | 12         |                | 3        | 20       |                |
| Female             | 6          | 14         |                | 1        | 16       |                |
| Fuhrman grade      |            |            | 0.0020         |          |          | 0.0008         |
| Low (G1/G2)        | 4          | 21         |                | 4        | 4        |                |
| High (G3/G4)       | 10         | 5          |                | 0        | 32       |                |
| Primary T stage    |            |            | 0.0009         |          |          | 0.0090         |
| Low (pT1/pT2)      | 3          | 25         |                | 3        | 6        |                |
| High (pT3/pT4)     | 11         | 3          |                | 1        | 30       |                |
